# Supplementary material
Source: HighWire-hosted journal article supplement (https://erj.ersjournals.com/content/60/1/2102106)

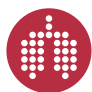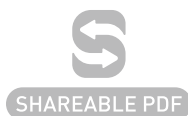

# The environmental impact of inhaled therapy: making informed treatment choices

Ashley Woodcock<sup>1,2</sup>, Kai M. Beeh<sup>3</sup>, Hironori Sagara<sup>4</sup>, Simon Aumônier<sup>5</sup>, Emmanuel Addo-Yobo<sup>6</sup>, Javaid Khan<sup>7</sup>, Jørgen Vestbo<sup>1,2</sup> and Helen Tope<sup>8</sup>

<sup>1</sup>Division of Infection, Immunity and Respiratory Medicine, School of Biological Sciences, University of Manchester, Manchester, UK. <sup>2</sup>Manchester Academic Health Science Centre and NIHR Manchester Biomedical Research Centre, Manchester University Hospitals NHS Foundation Trust, Manchester, UK. <sup>3</sup>Insaf Respiratory Research Institute, Wiesbaden, Germany. <sup>4</sup>Dept of Medicine, Division of Respiratory Medicine and Allergology, Showa University, Tokyo, Japan. <sup>5</sup>ERM: Environmental Resources Management, Oxford, UK. <sup>6</sup>Dept of Child Health, School of Medicine and Dentistry, Kwame Nkrumah University of Science and Technology, Kumasi, Ghana. <sup>7</sup>Section of Pulmonary and Critical Care Medicine, The Aga Khan University, Karachi, Pakistan. <sup>8</sup>Planet Futures, Melbourne, Australia.

Corresponding author: Ashley Woodcock ([ashley.woodcock@manchester.ac.uk](mailto:ashley.woodcock@manchester.ac.uk))

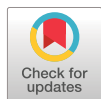

Shareable abstract (@ERSpublications)

**There is increasing interest regarding the carbon footprint of inhaled therapies; while efficacy, safety and patient preference should be prioritised, the increasingly available carbon footprint data may be factored into treatment decision making** <https://bit.ly/3l6atV2>

**Cite this article as:** Woodcock A, Beeh KM, Sagara H, *et al.* The environmental impact of inhaled therapy: making informed treatment choices. *Eur Respir J* 2022; 60: 2102106 [DOI: 10.1183/13993003.02106-2021].

This single-page version can be shared freely online.

Copyright ©The authors 2022.

This version is distributed under the terms of the Creative Commons Attribution Non-Commercial Licence 4.0. For commercial reproduction rights and permissions contact [permissions@ersnet.org](mailto:permissions@ersnet.org)

Received: 28 July 2021  
Accepted: 22 Nov 2021

## Abstract

When selecting the best inhaler and drug combination for a patient with respiratory disease, a number of factors should be considered. While efficacy and safety of medical treatments are always a priority, in recent years the environmental impacts of all aspects of life have become an increasingly necessary consideration and inhaled therapies are no exception. The carbon footprint of an item, individual or organisation is one of the most important and quantifiable environmental impacts, assessed by the amount of greenhouse gases (often expressed in terms of carbon dioxide equivalents) generated throughout the life cycle. The two most commonly prescribed and manufactured inhaler types worldwide are pressurised metered-dose inhalers (pMDIs) containing hydrofluorocarbon (HFC) propellants and dry powder inhalers (DPIs). Most of the carbon footprint of current pMDIs is a result of the propellants that they contain (HFC-134a and HFC-227ea, which are potent greenhouse gases). In comparison, the powder in DPIs is dispersed by the patient's own inhalation, meaning DPIs do not contain a propellant and have a lower carbon footprint than most pMDIs currently available. Soft mist inhalers are another propellant-free option: the device contains a spring, which provides the energy to disperse the aqueous medication. In this review, we examine the published data on carbon footprint data for inhalers, providing an analysis of potential implications for treatment decision making and industry initiatives.

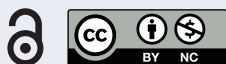

Supplement: inline-supplementary-material-1 [file inline-supplementary-material-1.pdf]
